# Supplementary material for: Emergence and Spread of B.1.1.7 Lineage in Primary Care and Clinical Impact in the Morbi-Mortality among Hospitalized Patients in Madrid, Spain
Source: MDPI journal article supplement (doi:10.3390/microorganisms9071517), 2021-07-15
Supplement: s1 [file s1]

**Table S2.** Demographic and clinical characteristics of the patients infected by B.1.1.7 and non-B.1.1.7 lineages according to age group ( $\leq 65$  and  $> 65$  year). IQR: interquartile range, OR: odds ratio, 95%CI: 95% confidence interval, ICU: intensive care unit, IRCU: intensive respiratory care unit, sig: significance.

| Variable              | Patients $\leq 65$ Years          |                              |          |                     | Patients $> 65$ Years             |                              |              |                     |
|-----------------------|-----------------------------------|------------------------------|----------|---------------------|-----------------------------------|------------------------------|--------------|---------------------|
|                       | B.1.1.7/SGTF<br>( <i>n</i> = 191) | B.1.1.7<br>( <i>n</i> = 453) | <i>p</i> | OR                  | B.1.1.7/SGTF<br>( <i>n</i> = 235) | B.1.1.7<br>( <i>n</i> = 676) | <i>p</i>     | OR                  |
| <b>Age (median)</b>   | 54                                | 54                           | 0.62     |                     | 78                                | 82                           | <b>0.001</b> |                     |
| <b>IQR</b>            | (45–60)                           | (47–60)                      |          |                     | (71–86)                           | (74–88)                      |              |                     |
| <b>Sex</b>            |                                   |                              |          |                     |                                   |                              |              |                     |
| <b>Women</b>          | 36.1%                             | 36.9%                        | 0.86     |                     | 45.1%                             | 49.3%                        | 0.27         |                     |
| <b>Men</b>            | 63.9%                             | 63.1%                        |          |                     | 54.9%                             | 50.7%                        |              |                     |
| <b>ICU admission</b>  | 23.6%                             | 18.1%                        | 0.11     | 1.39<br>(0.92–2.1)  | 16.2%                             | 5.0%                         | <b>0.001</b> | 3.64<br>(2.23–5.94) |
| <b>(95%CI)</b>        | (17.73–30.23)                     | (14.66–21.96)                |          |                     | (11.7–21.51)                      | (3.5–6.96)                   |              |                     |
| <b>IRCU admission</b> | 4.2%                              | 1.8%                         | 0.07     | 2.43<br>(0.89–6.58) | 12.3%                             | 6.2%                         | <b>0.03</b>  | 2.12<br>(1.29–3.49) |
| <b>(95%CI)</b>        | (1.82–8.09)                       | (0.76–3.45)                  |          |                     | (8.42–17.24)                      | (4.51–8.3)                   |              |                     |
| <b>Death</b>          | 4.2%                              | 3.5%                         | 0.68     | 1.21<br>(0.48–3.02) | 22.5%                             | 23.6%                        | 0.57         | 0.82<br>(0.64–1.38) |
| <b>(95%CI)</b>        | (1.69–8.39)                       | (1.96–5.66)                  |          |                     | (16.79–29.1)                      | (20.37–27.03)                |              |                     |
