# Supplementary material for: Emergence and Spread of B.1.1.7 Lineage in Primary Care and Clinical Impact in the Morbi-Mortality among Hospitalized Patients in Madrid, Spain
Source: MDPI journal article supplement (doi:10.3390/microorganisms9071517), 2021-07-15
Supplement: s1 [file s1]

**Table S1.** Accession numbers available in GISAID of SARS-CoV-2 sequences belonging to B.1.1.7 lineage from COVID-19 patients detected during the period of study.

| Screening  | Sequencing | GISAID access number | Date of sampling |
|------------|------------|----------------------|------------------|
| UK variant | B.1.1.7    | EPI_ISL_882617       | Dec 2020         |
| UK variant | B.1.1.7    | EPI_ISL_882621       | Dec 2020         |
| UK variant | B.1.1.7    | EPI_ISL_882623       | Dec 2020         |
| UK variant | B.1.1.7    | EPI_ISL_882612       | Jan 2021         |
| UK variant | B.1.1.7    | EPI_ISL_882613       | Jan 2021         |
| UK variant | B.1.1.7    | EPI_ISL_882615       | Jan 2021         |
| UK variant | B.1.1.7    | EPI_ISL_882616       | Jan 2021         |
| UK variant | B.1.1.7    | EPI_ISL_882618       | Jan 2021         |
| UK variant | B.1.1.7    | EPI_ISL_882620       | Jan 2021         |
| UK variant | B.1.1.7    | EPI_ISL_882624       | Jan 2021         |
| UK variant | B.1.1.7    | EPI_ISL_882625       | Jan 2021         |
| UK variant | B.1.1.7    | EPI_ISL_882627       | Jan 2021         |
| UK variant | B.1.1.7    | EPI_ISL_882628       | Jan 2021         |
| UK variant | B.1.1.7    | EPI_ISL_882629       | Jan 2021         |
| UK variant | B.1.1.7    | EPI_ISL_882631       | Jan 2021         |
| UK variant | B.1.1.7    | EPI_ISL_882632       | Jan 2021         |
| UK variant | B.1.1.7    | EPI_ISL_931584       | Feb 2021         |
| UK variant | B.1.1.7    | EPI_ISL_933718       | Feb 2021         |
| UK variant | B.1.1.7    | EPI_ISL_933721       | Feb 2021         |
| UK variant | B.1.1.7    | EPI_ISL_933723       | Feb 2021         |
| UK variant | B.1.1.7    | EPI_ISL_933725       | Feb 2021         |
| UK variant | B.1.1.7    | EPI_ISL_933727       | Feb 2021         |
| UK variant | B.1.1.7    | EPI_ISL_933728       | Feb 2021         |
| UK variant | B.1.1.7    | EPI_ISL_933729       | Feb 2021         |
| UK variant | B.1.1.7    | EPI_ISL_933730       | Feb 2021         |
| UK variant | B.1.1.7    | EPI_ISL_933731       | Feb 2021         |
| UK variant | B.1.1.7    | EPI_ISL_933733       | Feb 2021         |
| UK variant | B.1.1.7    | EPI_ISL_933734       | Feb 2021         |
| UK variant | B.1.1.7    | EPI_ISL_933740       | Feb 2021         |
| UK variant | B.1.1.7    | EPI_ISL_933767       | Feb 2021         |
| UK variant | B.1.1.7    | EPI_ISL_933768       | Feb 2021         |
| UK variant | B.1.1.7    | EPI_ISL_933770       | Feb 2021         |
| UK variant | B.1.1.7    | EPI_ISL_933771       | Feb 2021         |
| UK variant | B.1.1.7    | EPI_ISL_933773       | Feb 2021         |
| UK variant | B.1.1.7    | EPI_ISL_933774       | Feb 2021         |
| UK variant | B.1.1.7    | EPI_ISL_1665128      | Mar 2021         |
| UK variant | B.1.1.7    | EPI_ISL_1665130      | Mar 2021         |
| UK variant | B.1.1.7    | EPI_ISL_1665132      | Mar 2021         |
| UK variant | B.1.1.7    | EPI_ISL_1665133      | Mar 2021         |
| UK variant | B.1.1.7    | EPI_ISL_1665134      | Mar 2021         |
| UK variant | B.1.1.7    | EPI_ISL_1665137      | Mar 2021         |

|            |         |                 |          |
|------------|---------|-----------------|----------|
| UK variant | B.1.1.7 | EPI_ISL_1665140 | Mar 2021 |
| UK variant | B.1.1.7 | EPI_ISL_1665141 | Mar 2021 |
| UK variant | B.1.1.7 | EPI_ISL_1665142 | Mar 2021 |
| UK variant | B.1.1.7 | EPI_ISL_1665143 | Mar 2021 |
| UK variant | B.1.1.7 | EPI_ISL_1665193 | Mar 2021 |
| UK variant | B.1.1.7 | EPI_ISL_1665196 | Mar 2021 |
| UK variant | B.1.1.7 | EPI_ISL_1665197 | Mar 2021 |
| UK variant | B.1.1.7 | EPI_ISL_1665238 | Mar 2021 |
| UK variant | B.1.1.7 | EPI_ISL_1665239 | Mar 2021 |
| UK variant | B.1.1.7 | EPI_ISL_1665240 | Mar 2021 |
| UK variant | B.1.1.7 | EPI_ISL_1665241 | Mar 2021 |
| UK variant | B.1.1.7 | EPI_ISL_1665242 | Mar 2021 |
| UK variant | B.1.1.7 | EPI_ISL_1665244 | Mar 2021 |
| UK variant | B.1.1.7 | EPI_ISL_1665253 | Mar 2021 |
| UK variant | B.1.1.7 | EPI_ISL_1665270 | Mar 2021 |
| UK variant | B.1.1.7 | EPI_ISL_1665271 | Mar 2021 |
| UK variant | B.1.1.7 | EPI_ISL_1665275 | Mar 2021 |
| UK variant | B.1.1.7 | EPI_ISL_1665276 | Mar 2021 |
| UK variant | B.1.1.7 | EPI_ISL_1665277 | Mar 2021 |
| UK variant | B.1.1.7 | EPI_ISL_1665279 | Mar 2021 |
| UK variant | B.1.1.7 | EPI_ISL_1665280 | Mar 2021 |
| UK variant | B.1.1.7 | EPI_ISL_1912208 | Apr 2021 |
| UK variant | B.1.1.7 | EPI_ISL_1912210 | Apr 2021 |
| UK variant | B.1.1.7 | EPI_ISL_1912213 | Apr 2021 |
| UK variant | B.1.1.7 | EPI_ISL_1912216 | Apr 2021 |
| UK variant | B.1.1.7 | EPI_ISL_1912219 | Apr 2021 |
| UK variant | B.1.1.7 | EPI_ISL_1912222 | Apr 2021 |
| UK variant | B.1.1.7 | EPI_ISL_1912224 | Apr 2021 |
| UK variant | B.1.1.7 | EPI_ISL_1912227 | Apr 2021 |
| UK variant | B.1.1.7 | EPI_ISL_1912233 | Apr 2021 |
| UK variant | B.1.1.7 | EPI_ISL_1912236 | Apr 2021 |
| UK variant | B.1.1.7 | EPI_ISL_1912239 | Apr 2021 |
| UK variant | B.1.1.7 | EPI_ISL_1912244 | Apr 2021 |
| UK variant | B.1.1.7 | EPI_ISL_1912247 | Apr 2021 |
| UK variant | B.1.1.7 | EPI_ISL_1912250 | Apr 2021 |
| UK variant | B.1.1.7 | EPI_ISL_1912252 | Apr 2021 |
| UK variant | B.1.1.7 | EPI_ISL_1912255 | Apr 2021 |
| UK variant | B.1.1.7 | EPI_ISL_1912258 | Apr 2021 |
| UK variant | B.1.1.7 | EPI_ISL_1912260 | Apr 2021 |
| UK variant | B.1.1.7 | EPI_ISL_1912263 | Apr 2021 |
| UK variant | B.1.1.7 | EPI_ISL_1912266 | Apr 2021 |
| UK variant | B.1.1.7 | EPI_ISL_1912269 | Apr 2021 |
| UK variant | B.1.1.7 | EPI_ISL_1912271 | Apr 2021 |
| UK variant | B.1.1.7 | EPI_ISL_1912277 | Apr 2021 |
| UK variant | B.1.1.7 | EPI_ISL_1912282 | Apr 2021 |

|            |         |                 |          |
|------------|---------|-----------------|----------|
| UK variant | B.1.1.7 | EPI_ISL_1912285 | Apr 2021 |
| UK variant | B.1.1.7 | EPI_ISL_1912287 | Apr 2021 |
| UK variant | B.1.1.7 | EPI_ISL_1912290 | Apr 2021 |
| UK variant | B.1.1.7 | EPI_ISL_1912293 | Apr 2021 |
| UK variant | B.1.1.7 | EPI_ISL_1912299 | Apr 2021 |
| UK variant | B.1.1.7 | EPI_ISL_1912302 | Apr 2021 |
| UK variant | B.1.1.7 | EPI_ISL_1912308 | Apr 2021 |
| UK variant | B.1.1.7 | EPI_ISL_1912310 | Apr 2021 |
| UK variant | B.1.1.7 | EPI_ISL_1912315 | Apr 2021 |
| UK variant | B.1.1.7 | EPI_ISL_2104411 | Apr 2021 |
| UK variant | B.1.1.7 | EPI_ISL_2104412 | Apr 2021 |
| UK variant | B.1.1.7 | EPI_ISL_2104413 | Apr 2021 |
| UK variant | B.1.1.7 | EPI_ISL_2104414 | Apr 2021 |
| UK variant | B.1.1.7 | EPI_ISL_2104416 | Apr 2021 |
